# Supplementary material
Source: publisher figshare collection journal article supplement (https://acs.figshare.com/ndownloader/files/4100158)
Supplement: Supplementary file 1 [file 4100158]

 
data_shelxl
 
_audit_creation_method            SHELXL-97
_chemical_name_systematic
;
 ?
;
_chemical_name_common             ?
_chemical_melting_point           ?
_chemical_formula_moiety          
 'C78 H82 N4 O9. K 1+, F 1-, 3 C H4 O'
_chemical_formula_sum
 'C81 H94 F K N4 O12'
_chemical_formula_weight          1373.70
 
loop_
 _atom_type_symbol
 _atom_type_description
 _atom_type_scat_dispersion_real
 _atom_type_scat_dispersion_imag
 _atom_type_scat_source
 'C'  'C'   0.0181   0.0091
 'International Tables Vol C Tables 4.2.6.8 and 6.1.1.4'
 'H'  'H'   0.0000   0.0000
 'International Tables Vol C Tables 4.2.6.8 and 6.1.1.4'
 'N'  'N'   0.0311   0.0180
 'International Tables Vol C Tables 4.2.6.8 and 6.1.1.4'
 'O'  'O'   0.0492   0.0322
 'International Tables Vol C Tables 4.2.6.8 and 6.1.1.4'
 'F'  'F'   0.0727   0.0534
 'International Tables Vol C Tables 4.2.6.8 and 6.1.1.4'
 'K'  'K'   0.3868   1.0657
 'International Tables Vol C Tables 4.2.6.8 and 6.1.1.4'
 
_symmetry_cell_setting            Orthorhombic
_symmetry_space_group_name_H-M    Pnma
 
loop_
 _symmetry_equiv_pos_as_xyz
 'x, y, z'
 '-x+1/2, -y, z+1/2'
 'x+1/2, -y+1/2, -z+1/2'
 '-x, y+1/2, -z'
 '-x, -y, -z'
 'x-1/2, y, -z-1/2'
 '-x-1/2, y-1/2, z-1/2'
 'x, -y-1/2, z'
 
_cell_length_a                    36.554(4)
_cell_length_b                    15.5755(8)
_cell_length_c                    12.4572(6)
_cell_angle_alpha                 90.00
_cell_angle_beta                  90.00
_cell_angle_gamma                 90.00
_cell_volume                      7092.5(9)
_cell_formula_units_Z             4
_cell_measurement_temperature     100(2)
_cell_measurement_reflns_used     65598
_cell_measurement_theta_min       6.0
_cell_measurement_theta_max       140.0

 
_exptl_crystal_description        prisms
_exptl_crystal_colour             colorless
_exptl_crystal_size_max           ?
_exptl_crystal_size_mid           ?
_exptl_crystal_size_min           ?
_exptl_crystal_density_meas       ?
_exptl_crystal_density_diffrn     1.286
_exptl_crystal_density_method     'not measured'
_exptl_crystal_F_000              2928
_exptl_absorpt_coefficient_mu     1.217
_exptl_absorpt_correction_type    multi-scan
_exptl_absorpt_correction_T_min   0.714
_exptl_absorpt_correction_T_max   1.00
_exptl_absorpt_process_details    
;
Abscor. T. Higashi (2001).  The Rigaku Corporation, Tokyo, Japan.
;


_exptl_special_details
;
 ?
;
 
_diffrn_ambient_temperature       100(2)
_diffrn_radiation_wavelength      1.54180
_diffrn_radiation_type            CuK\a
_diffrn_radiation_source          'fine-focus sealed tube'
_diffrn_radiation_monochromator   graphite
_diffrn_measurement_device_type   'Rigaku R-Axis Spider with Image Plate'
_diffrn_measurement_method        \w-scans
_diffrn_detector_area_resol_mean  ?
_diffrn_standards_number          ?
_diffrn_standards_interval_count  ?
_diffrn_standards_interval_time   ?
_diffrn_standards_decay_%         ?
_diffrn_reflns_number             62427
_diffrn_reflns_av_R_equivalents   0.0807
_diffrn_reflns_av_sigmaI/netI     0.0806
_diffrn_reflns_limit_h_min        -43
_diffrn_reflns_limit_h_max        44
_diffrn_reflns_limit_k_min        -18
_diffrn_reflns_limit_k_max        16
_diffrn_reflns_limit_l_min        -14
_diffrn_reflns_limit_l_max        15
_diffrn_reflns_theta_min          6.65
_diffrn_reflns_theta_max          70.00
_reflns_number_total              6945
_reflns_number_gt                 4339
_reflns_threshold_expression      >2sigma(I)
 
_publ_section_references
;
Altomare A., Burla M.C., Camalli M., Cascarano G.L., Giacovazzo C., 
Guagliardi A., Moliterni A.G.G., Polidori G.,Spagna R. Sir97.  
(1999) J. Appl. Cryst. 32, 115-119.

Farrugia, L. J. (1999) J. Appl. Cryst., 32, 837-838.

Otwinowski, Z. and Minor, W.  (1997).  Methods in Enzymology,
276, Macromolecular Crystallography, part A, 307-326, C. W. Carter,
Jr. and R. M. Sweets, Eds., Academic Press.

Sheldrick, G. M.  (1998).  SHELXTL/PC.  Release 5.10.  Siemens 
Analytical X-ray Instruments, Inc., Madison, WI, USA.

Sluis, P. v.d. & Spek, A. L. (1990). SQUEEZE. Acta Cryst. A46, 194-201.

Spek, A. L. (1998) PLATON, A Multipurpose Crystallographic Tool, Utrecht 
University, Utrecht, The Netherlands. 

;

_computing_data_collection              'CrystalClear (Rigaku Inc., 2008)'
_computing_cell_refinement              'CrystalClear (Rigaku Inc., 2008)'
_computing_data_reduction               'CrystalClear (Rigaku Inc., 2008)'
_computing_structure_solution     
;

SIR97 - Altomare A., Burla M.C., Camalli M., Cascarano G.L., Giacovazzo C., 
Guagliardi A., Moliterni A.G.G., Polidori G.,Spagna R.
;
_computing_structure_refinement   'XL SHELXTL/PC, Siemens Analytical'
_computing_molecular_graphics     'XP SHELXTL/PC, Siemens Analytical' 
_computing_publication_material   ? 

 
_refine_special_details 
; 
 Refinement of F^2^ against ALL reflections.  The weighted R-factor wR and 
 goodness of fit S are based on F^2^, conventional R-factors R are based 
 on F, with F set to zero for negative F^2^. The threshold expression of 
 F^2^ > 2sigma(F^2^) is used only for calculating R-factors(gt) etc. and is 
 not relevant to the choice of reflections for refinement.  R-factors based 
 on F^2^ are statistically about twice as large as those based on F, and R- 
 factors based on ALL data will be even larger.
        The macrocycle, the K ion and the F ion all reside on a 
crystallographic mirror plane of symmetry at x, 1/4, z.  Methylene carbon 
atoms, C20 and C43, were disordered by symmetry.  The anisotropic 
displacement parameters for these atoms were restrained to be 
approximately isotropic. 
  A molecule of methanol was H-bound to the F- ion.  The carbon atom, 
C2a, was located on the mirror plane of symmetry.  The oxygen atom, O1a, 
was in a general position and was disordered by symmetry.  The hydrogen 
atoms of this methanol molecule were not included in the refinement 
model.

 
  Two molecules of what appeared to be methanol were found to be 
badly disordered.  Attempts 
to model the disorder were unsatisfactory.  The contributions to the 
scattering factors due to these solvent molecules were removed by use of 
the utility SQUEEZE (Sluis and Spek, 1990) in PLATON98 (Spek, 1998).  
PLATON98 was used as incorporated in WinGX (Farrugia, 1999).

; 


 
_refine_ls_structure_factor_coef  Fsqd
_refine_ls_matrix_type            full
_refine_ls_weighting_scheme       calc
_refine_ls_weighting_details
 'calc w=1/[\s^2^(Fo^2^)+(0.0654P)^2^+15.2478P] where P=(Fo^2^+2Fc^2^)/3'
_atom_sites_solution_primary      direct
_atom_sites_solution_secondary    difmap
_atom_sites_solution_hydrogens    geom
_refine_ls_hydrogen_treatment     constr
_refine_ls_extinction_method      none
_refine_ls_extinction_coef        ?
_refine_ls_number_reflns          6945
_refine_ls_number_parameters      472
_refine_ls_number_restraints      12
_refine_ls_R_factor_all           0.2000
_refine_ls_R_factor_gt            0.1404
_refine_ls_wR_factor_ref          0.2783
_refine_ls_wR_factor_gt           0.2471
_refine_ls_goodness_of_fit_ref    1.196
_refine_ls_restrained_S_all       1.203
_refine_ls_shift/su_max           0.007
_refine_ls_shift/su_mean          0.000
 
loop_
 _atom_site_label
 _atom_site_type_symbol
 _atom_site_fract_x
 _atom_site_fract_y
 _atom_site_fract_z
 _atom_site_U_iso_or_equiv
 _atom_site_adp_type
 _atom_site_occupancy
 _atom_site_symmetry_multiplicity
 _atom_site_calc_flag
 _atom_site_refinement_flags
 _atom_site_disorder_assembly
 _atom_site_disorder_group
K1 K 0.65116(4) 0.2500 0.58615(13) 0.0432(4) Uani 1 2 d S . .
F1 F 0.37307(13) 0.2500 0.8631(4) 0.0651(14) Uani 1 2 d S . .
O1 O 0.5090(2) 0.2500 1.0759(9) 0.122(3) Uani 1 2 d S . .
O2 O 0.56752(18) 0.2500 0.8910(6) 0.091(2) Uani 1 2 d S . .
O3 O 0.61815(13) 0.4079(3) 0.6171(4) 0.0806(14) Uani 1 1 d . . .
O4 O 0.69192(13) 0.4075(3) 0.5806(4) 0.0884(16) Uani 1 1 d . . .
O5 O 0.72558(17) 0.2500 0.5255(5) 0.082(2) Uani 1 2 d S . .
O6 O 0.53088(18) 0.2500 0.4651(5) 0.098(3) Uani 1 2 d S . .
O7 O 0.4542(2) 0.2500 0.4654(7) 0.128(4) Uani 1 2 d S . .
N1 N 0.32068(14) 0.1446(3) 0.7677(4) 0.0597(14) Uani 1 1 d . . .
H1 H 0.3386 0.1753 0.7950 0.072 Uiso 1 1 calc R . .
N2 N 0.34420(13) 0.1425(3) 1.0174(4) 0.0547(13) Uani 1 1 d . . .
H2 H 0.3575 0.1703 0.9698 0.066 Uiso 1 1 calc R . .
C1 C 0.29910(16) 0.1700(4) 0.6831(4) 0.0533(16) Uani 1 1 d . . .
C2 C 0.27472(18) 0.1051(4) 0.6661(5) 0.0663(18) Uani 1 1 d . . .
H2A H 0.2563 0.1040 0.6123 0.080 Uiso 1 1 calc R . .
C3 C 0.2816(2) 0.0396(4) 0.7427(6) 0.079(2) Uani 1 1 d . . .
H3 H 0.2683 -0.0126 0.7499 0.095 Uiso 1 1 calc R . .
C4 C 0.31042(19) 0.0645(4) 0.8041(5) 0.0678(19) Uani 1 1 d . . .
C5 C 0.3313(2) 0.0196(4) 0.8927(6) 0.077(2) Uani 1 1 d . . .
C6 C 0.32705(17) 0.0665(4) 0.9999(5) 0.0584(17) Uani 1 1 d . . .
C7 C 0.30905(17) 0.0447(4) 1.0910(6) 0.069(2) Uani 1 1 d . . .
H7 H 0.2947 -0.0055 1.1018 0.082 Uiso 1 1 calc R . .
C8 C 0.31549(16) 0.1107(4) 1.1675(5) 0.0553(16) Uani 1 1 d . . .
H8 H 0.3059 0.1129 1.2383 0.066 Uiso 1 1 calc R . .
C9 C 0.33763(15) 0.1697(4) 1.1218(5) 0.0502(15) Uani 1 1 d . . .
C10 C 0.3556(2) 0.2500 1.1663(6) 0.053(2) Uani 1 2 d S . .
C11 C 0.3074(2) 0.2500 0.6211(7) 0.056(2) Uani 1 2 d S . .
C12 C 0.2830(2) 0.2500 0.5198(6) 0.056(2) Uani 1 2 d S . .
H12A H 0.2577 0.2500 0.5408 0.084 Uiso 1 2 d SR . .
H12B H 0.2880 0.1997 0.4778 0.084 Uiso 1 1 d R . .
C13 C 0.3154(3) -0.0719(5) 0.9045(6) 0.114(3) Uani 1 1 d . . .
H13A H 0.2902 -0.0685 0.9311 0.171 Uiso 1 1 calc R . .
H13B H 0.3304 -0.1047 0.9555 0.171 Uiso 1 1 calc R . .
H13C H 0.3157 -0.1007 0.8346 0.171 Uiso 1 1 calc R . .
C14 C 0.3721(2) 0.0144(5) 0.8621(6) 0.099(3) Uani 1 1 d . . .
H14A H 0.3747 -0.0172 0.7945 0.149 Uiso 1 1 calc R . .
H14B H 0.3856 -0.0156 0.9189 0.149 Uiso 1 1 calc R . .
H14C H 0.3819 0.0725 0.8535 0.149 Uiso 1 1 calc R . .
C15 C 0.3492(3) 0.2500 1.2880(7) 0.070(3) Uani 1 2 d S . .
H15A H 0.3234 0.2500 1.3026 0.105 Uiso 1 2 d SR . .
H15B H 0.3602 0.1997 1.3189 0.105 Uiso 1 1 d R . .
C16 C 0.3970(2) 0.2500 1.1468(7) 0.056(2) Uani 1 2 d S . .
C17 C 0.41661(17) 0.3252(4) 1.1377(5) 0.0656(18) Uani 1 1 d . . .
H17 H 0.4041 0.3783 1.1457 0.079 Uiso 1 1 calc R . .
C18 C 0.45358(18) 0.3259(4) 1.1175(6) 0.0708(19) Uani 1 1 d . . .
H18 H 0.4662 0.3790 1.1120 0.085 Uiso 1 1 calc R . .
C19 C 0.4723(3) 0.2500 1.1053(8) 0.071(3) Uani 1 2 d S . .
C20 C 0.5275(6) 0.3076(15) 1.0460(19) 0.146(8) Uiso 0.50 1 d P . .
H20A H 0.5328 0.3505 1.1002 0.175 Uiso 0.50 1 d PR . .
H20B H 0.5164 0.3349 0.9840 0.175 Uiso 0.50 1 d PR . .
C21 C 0.5650(4) 0.2500 1.0042(14) 0.161(6) Uani 1 2 d SU . .
H21A H 0.5860 0.2785 1.0339 0.193 Uiso 0.50 1 d PR . .
H21B H 0.5634 0.1929 1.0329 0.193 Uiso 0.50 1 d PR . .
C22 C 0.6036(3) 0.2500 0.8603(7) 0.067(3) Uani 1 2 d S . .
C23 C 0.62141(18) 0.3283(5) 0.8450(5) 0.0643(18) Uani 1 1 d . . .
C24 C 0.65860(17) 0.3264(5) 0.8261(5) 0.0684(19) Uani 1 1 d . . .
H24A H 0.6715 0.3789 0.8172 0.082 Uiso 1 1 calc R . .
C25 C 0.6774(2) 0.2500 0.8198(7) 0.060(2) Uani 1 2 d S . .
H25A H 0.7032 0.2500 0.8111 0.072 Uiso 1 2 calc SR . .
C26 C 0.6004(2) 0.4112(5) 0.8442(7) 0.090(3) Uani 1 1 d . . .
H26A H 0.6181 0.4591 0.8371 0.108 Uiso 1 1 calc R . .
H26B H 0.5880 0.4177 0.9143 0.108 Uiso 1 1 calc R . .
C27 C 0.5721(2) 0.4196(5) 0.7562(8) 0.083(2) Uani 1 1 d . . .
C28 C 0.5817(2) 0.4157(4) 0.6483(8) 0.082(2) Uani 1 1 d . . .
C29 C 0.5561(2) 0.4171(5) 0.5663(8) 0.097(3) Uani 1 1 d . . .
C30 C 0.5200(3) 0.4234(7) 0.5936(10) 0.138(4) Uani 1 1 d . . .
H30 H 0.5020 0.4238 0.5384 0.165 Uiso 1 1 calc R . .
C31 C 0.5089(3) 0.4293(7) 0.6998(11) 0.133(4) Uani 1 1 d . . .
H31 H 0.4838 0.4354 0.7176 0.160 Uiso 1 1 calc R . .
C32 C 0.5355(2) 0.4262(5) 0.7801(8) 0.104(3) Uani 1 1 d . . .
H32 H 0.5282 0.4287 0.8532 0.125 Uiso 1 1 calc R . .
C33 C 0.5671(3) 0.4112(7) 0.4497(8) 0.122(4) Uani 1 1 d . . .
H33A H 0.5844 0.4584 0.4340 0.146 Uiso 1 1 calc R . .
H33B H 0.5451 0.4204 0.4049 0.146 Uiso 1 1 calc R . .
C34 C 0.5847(2) 0.3274(7) 0.4165(6) 0.096(3) Uani 1 1 d . . .
C35 C 0.6194(3) 0.3262(8) 0.3689(7) 0.120(4) Uani 1 1 d . . .
H35A H 0.6316 0.3787 0.3536 0.144 Uiso 1 1 calc R . .
C36 C 0.6358(5) 0.2500 0.3445(11) 0.134(7) Uani 1 2 d S . .
H36A H 0.6590 0.2500 0.3099 0.161 Uiso 1 2 calc SR . .
C37 C 0.5669(3) 0.2500 0.4322(8) 0.083(4) Uani 1 2 d S . .
C38 C 0.6398(2) 0.4858(5) 0.6262(8) 0.106(3) Uani 1 1 d . . .
H38A H 0.6484 0.4928 0.7010 0.127 Uiso 1 1 calc R . .
H38B H 0.6246 0.5363 0.6074 0.127 Uiso 1 1 calc R . .
C39 C 0.6713(2) 0.4800(6) 0.5527(8) 0.113(3) Uani 1 1 d . . .
H39A H 0.6627 0.4750 0.4776 0.135 Uiso 1 1 calc R . .
H39B H 0.6866 0.5323 0.5587 0.135 Uiso 1 1 calc R . .
C40 C 0.7246(2) 0.4040(6) 0.5189(8) 0.110(3) Uani 1 1 d . . .
H40A H 0.7394 0.4562 0.5314 0.132 Uiso 1 1 calc R . .
H40B H 0.7186 0.4006 0.4415 0.132 Uiso 1 1 calc R . .
C41 C 0.74609(19) 0.3241(6) 0.5534(6) 0.095(3) Uani 1 1 d . . .
H41A H 0.7701 0.3229 0.5168 0.114 Uiso 1 1 calc R . .
H41B H 0.7504 0.3254 0.6318 0.114 Uiso 1 1 calc R . .
C42 C 0.5067(3) 0.2500 0.3721(10) 0.117(4) Uani 1 2 d SU . .
H42A H 0.5182 0.2217 0.3125 0.140 Uiso 0.50 1 d PR . .
H42B H 0.5004 0.3075 0.3514 0.140 Uiso 0.50 1 d PR . .
C43 C 0.4695(4) 0.2034(10) 0.4114(12) 0.073(4) Uani 0.50 1 d P . .
H43A H 0.4538 0.1868 0.3530 0.088 Uiso 0.50 1 d PR . .
H43B H 0.4758 0.1539 0.4535 0.088 Uiso 0.50 1 d PR . .
C44 C 0.4195(3) 0.2500 0.5046(8) 0.079(3) Uani 1 2 d S . .
C45 C 0.40197(19) 0.3257(5) 0.5251(6) 0.082(2) Uani 1 1 d . . .
H45 H 0.4140 0.3788 0.5121 0.098 Uiso 1 1 calc R . .
C46 C 0.36658(18) 0.3248(5) 0.5647(5) 0.072(2) Uani 1 1 d . . .
H46 H 0.3549 0.3782 0.5786 0.086 Uiso 1 1 calc R . .
C47 C 0.3475(3) 0.2500 0.5851(7) 0.059(2) Uani 1 2 d S . .
O1A O 0.4384(3) 0.1740(7) 0.8351(8) 0.090(3) Uani 0.50 1 d P . .
C2A C 0.4595(3) 0.2500 0.7953(12) 0.114(4) Uani 1 2 d S . .
 
loop_
 _atom_site_aniso_label
 _atom_site_aniso_U_11
 _atom_site_aniso_U_22
 _atom_site_aniso_U_33
 _atom_site_aniso_U_23
 _atom_site_aniso_U_13
 _atom_site_aniso_U_12
K1 0.0403(9) 0.0406(9) 0.0487(10) 0.000 0.0068(8) 0.000
F1 0.059(3) 0.084(4) 0.052(3) 0.000 -0.002(2) 0.000
O1 0.048(5) 0.109(7) 0.210(10) 0.000 -0.017(6) 0.000
O2 0.052(4) 0.139(7) 0.082(5) 0.000 0.001(4) 0.000
O3 0.073(3) 0.051(3) 0.118(4) 0.009(3) -0.008(3) 0.002(2)
O4 0.064(3) 0.083(4) 0.118(4) 0.036(3) 0.002(3) -0.012(3)
O5 0.050(4) 0.129(7) 0.066(4) 0.000 0.006(3) 0.000
O6 0.053(4) 0.191(8) 0.050(4) 0.000 -0.004(3) 0.000
O7 0.040(5) 0.265(14) 0.081(6) 0.000 0.004(4) 0.000
N1 0.068(3) 0.058(3) 0.054(3) -0.009(3) -0.003(3) -0.007(3)
N2 0.060(3) 0.056(3) 0.048(3) 0.006(2) 0.000(2) -0.008(3)
C1 0.057(4) 0.067(4) 0.035(3) -0.003(3) -0.007(3) -0.001(3)
C2 0.067(4) 0.070(5) 0.061(4) -0.002(4) -0.020(4) -0.009(4)
C3 0.104(6) 0.054(4) 0.079(5) -0.002(4) -0.014(5) -0.017(4)
C4 0.085(5) 0.052(4) 0.066(5) -0.011(4) -0.016(4) -0.011(4)
C5 0.104(6) 0.054(4) 0.073(5) 0.001(4) -0.027(4) 0.003(4)
C6 0.066(4) 0.042(4) 0.067(4) 0.015(3) -0.019(3) -0.007(3)
C7 0.060(4) 0.054(4) 0.091(5) 0.040(4) -0.006(4) -0.011(3)
C8 0.056(4) 0.058(4) 0.052(4) 0.009(3) 0.003(3) 0.002(3)
C9 0.047(4) 0.052(4) 0.051(4) 0.011(3) -0.003(3) 0.000(3)
C10 0.057(6) 0.065(6) 0.037(5) 0.000 0.001(4) 0.000
C11 0.056(6) 0.065(6) 0.048(5) 0.000 -0.004(4) 0.000
C12 0.060(6) 0.063(6) 0.045(5) 0.000 -0.002(4) 0.000
C13 0.199(10) 0.055(5) 0.088(6) -0.002(4) -0.048(6) -0.008(6)
C14 0.134(8) 0.088(6) 0.075(5) -0.021(5) -0.022(5) 0.054(5)
C15 0.065(6) 0.088(7) 0.057(6) 0.000 -0.001(5) 0.000
C16 0.053(6) 0.071(6) 0.044(5) 0.000 -0.006(4) 0.000
C17 0.050(4) 0.064(4) 0.082(5) -0.006(4) 0.000(3) -0.003(3)
C18 0.056(4) 0.060(4) 0.096(5) -0.002(4) -0.003(4) -0.006(4)
C19 0.042(6) 0.080(7) 0.090(8) 0.000 -0.004(5) 0.000
C21 0.129(9) 0.209(11) 0.143(9) 0.000 0.039(8) 0.000
C22 0.047(6) 0.097(8) 0.056(6) 0.000 -0.007(5) 0.000
C23 0.055(4) 0.080(5) 0.058(4) -0.025(4) -0.003(3) 0.000(4)
C24 0.055(4) 0.084(5) 0.066(4) -0.014(4) -0.005(3) -0.001(4)
C25 0.036(5) 0.092(8) 0.053(6) 0.000 -0.005(4) 0.000
C26 0.068(5) 0.087(6) 0.115(7) -0.046(5) 0.007(5) 0.014(4)
C27 0.073(5) 0.062(5) 0.115(7) -0.020(5) 0.000(5) 0.020(4)
C28 0.061(5) 0.051(5) 0.133(8) -0.004(5) 0.002(5) 0.023(4)
C29 0.066(6) 0.100(7) 0.123(8) 0.038(6) 0.004(6) 0.025(5)
C30 0.100(8) 0.160(10) 0.153(11) 0.061(9) -0.004(8) 0.054(7)
C31 0.070(6) 0.143(9) 0.186(12) 0.029(9) -0.007(8) 0.053(6)
C32 0.077(6) 0.091(6) 0.145(8) -0.020(6) 0.007(6) 0.044(5)
C33 0.088(7) 0.145(10) 0.132(9) 0.072(7) -0.021(6) 0.015(6)
C34 0.064(5) 0.151(9) 0.072(5) 0.043(6) -0.002(4) 0.008(6)
C35 0.084(7) 0.205(14) 0.071(6) 0.065(8) 0.000(5) -0.014(7)
C36 0.090(12) 0.25(3) 0.061(9) 0.000 0.011(8) 0.000
C37 0.052(7) 0.154(13) 0.043(6) 0.000 0.001(5) 0.000
C38 0.095(6) 0.058(5) 0.163(9) 0.015(5) -0.006(6) -0.010(5)
C39 0.085(6) 0.077(6) 0.175(10) 0.042(6) 0.004(6) -0.007(5)
C40 0.071(6) 0.126(8) 0.135(8) 0.065(6) 0.000(5) -0.018(5)
C41 0.060(5) 0.138(8) 0.087(5) 0.039(5) 0.002(4) -0.045(5)
C42 0.084(7) 0.174(9) 0.092(7) 0.000 -0.009(6) 0.000
C43 0.045(9) 0.105(11) 0.071(10) 0.003(9) 0.006(7) -0.007(8)
C44 0.054(7) 0.125(11) 0.059(7) 0.000 -0.004(5) 0.000
C45 0.055(5) 0.096(6) 0.094(6) 0.034(5) 0.001(4) -0.004(4)
C46 0.064(5) 0.079(5) 0.073(5) 0.021(4) -0.004(4) 0.012(4)
C47 0.060(6) 0.068(6) 0.049(5) 0.000 0.000(5) 0.000
O1A 0.085(7) 0.088(8) 0.098(8) 0.007(6) 0.024(6) 0.017(6)
C2A 0.072(8) 0.128(12) 0.143(12) 0.000 0.022(8) 0.000
 
_geom_special_details
;
 All esds (except the esd in the dihedral angle between two l.s. planes)
 are estimated using the full covariance matrix.  The cell esds are taken
 into account individually in the estimation of esds in distances, angles
 and torsion angles; correlations between esds in cell parameters are only
 used when they are defined by crystal symmetry.  An approximate (isotropic)
 treatment of cell esds is used for estimating esds involving l.s. planes.
;
 
loop_
 _geom_bond_atom_site_label_1
 _geom_bond_atom_site_label_2
 _geom_bond_distance
 _geom_bond_site_symmetry_2
 _geom_bond_publ_flag
K1 O3 2.767(4) 8_565 ?
K1 O3 2.767(4) . ?
K1 O5 2.823(7) . ?
K1 O4 2.871(5) . ?
K1 O4 2.871(5) 8_565 ?
K1 C36 3.062(14) . ?
K1 C25 3.064(8) . ?
K1 C35 3.174(8) 8_565 ?
K1 C35 3.174(8) . ?
K1 C24 3.228(6) . ?
K1 C24 3.228(6) 8_565 ?
K1 C34 3.438(8) 8_565 ?
O1 C20 1.18(2) . ?
O1 C20 1.18(2) 8_565 ?
O1 C19 1.392(11) . ?
O2 C22 1.374(10) . ?
O2 C21 1.413(16) . ?
O3 C28 1.394(8) . ?
O3 C38 1.452(8) . ?
O4 C39 1.401(9) . ?
O4 C40 1.422(9) . ?
O5 C41 1.419(8) . ?
O5 C41 1.419(8) 8_565 ?
O6 C37 1.378(11) . ?
O6 C42 1.457(12) . ?
O7 C43 1.137(13) 8_565 ?
O7 C43 1.137(13) . ?
O7 C44 1.357(12) . ?
N1 C1 1.375(7) . ?
N1 C4 1.379(8) . ?
N1 H1 0.8800 . ?
N2 C6 1.356(7) . ?
N2 C9 1.389(7) . ?
N2 H2 0.8800 . ?
C1 C2 1.364(8) . ?
C1 C11 1.496(7) . ?
C2 C3 1.420(9) . ?
C2 H2A 0.9500 . ?
C3 C4 1.358(9) . ?
C3 H3 0.9500 . ?
C4 C5 1.513(9) . ?
C5 C6 1.530(9) . ?
C5 C14 1.542(10) . ?
C5 C13 1.546(10) . ?
C6 C7 1.355(8) . ?
C7 C8 1.420(9) . ?
C7 H7 0.9500 . ?
C8 C9 1.350(7) . ?
C8 H8 0.9500 . ?
C9 C10 1.518(7) . ?
C10 C9 1.518(7) 8_565 ?
C10 C16 1.533(11) . ?
C10 C15 1.535(11) . ?
C11 C1 1.496(7) 8_565 ?
C11 C47 1.533(12) . ?
C11 C12 1.546(11) . ?
C12 H12A 0.9601 . ?
C12 H12B 0.9601 . ?
C13 H13A 0.9800 . ?
C13 H13B 0.9800 . ?
C13 H13C 0.9800 . ?
C14 H14A 0.9800 . ?
C14 H14B 0.9800 . ?
C14 H14C 0.9800 . ?
C15 H15A 0.9599 . ?
C15 H15B 0.9600 . ?
C16 C17 1.377(7) . ?
C16 C17 1.377(7) 8_565 ?
C17 C18 1.375(8) . ?
C17 H17 0.9500 . ?
C18 C19 1.374(8) . ?
C18 H18 0.9500 . ?
C19 C18 1.374(8) 8_565 ?
C20 C21 1.72(2) . ?
C20 C20 1.79(5) 8_565 ?
C20 H20A 0.9701 . ?
C20 H20B 0.9701 . ?
C21 C20 1.72(2) 8_565 ?
C21 H21A 0.9600 . ?
C21 H21B 0.9599 . ?
C22 C23 1.396(8) 8_565 ?
C22 C23 1.396(8) . ?
C23 C24 1.380(8) . ?
C23 C26 1.501(9) . ?
C24 C25 1.376(7) . ?
C24 H24A 0.9500 . ?
C25 C24 1.376(7) 8_565 ?
C25 H25A 0.9500 . ?
C26 C27 1.515(10) . ?
C26 H26A 0.9900 . ?
C26 H26B 0.9900 . ?
C27 C32 1.372(10) . ?
C27 C28 1.390(11) . ?
C28 C29 1.386(11) . ?
C29 C30 1.365(12) . ?
C29 C33 1.510(12) . ?
C30 C31 1.387(13) . ?
C30 H30 0.9500 . ?
C31 C32 1.396(12) . ?
C31 H31 0.9500 . ?
C32 H32 0.9500 . ?
C33 C34 1.512(13) . ?
C33 H33A 0.9900 . ?
C33 H33B 0.9900 . ?
C34 C37 1.384(10) . ?
C34 C35 1.402(11) . ?
C35 C36 1.365(11) . ?
C35 H35A 0.9500 . ?
C36 C35 1.365(11) 8_565 ?
C36 H36A 0.9500 . ?
C37 C34 1.384(10) 8_565 ?
C38 C39 1.476(11) . ?
C38 H38A 0.9900 . ?
C38 H38B 0.9900 . ?
C39 H39A 0.9900 . ?
C39 H39B 0.9900 . ?
C40 C41 1.532(11) . ?
C40 H40A 0.9900 . ?
C40 H40B 0.9900 . ?
C41 H41A 0.9900 . ?
C41 H41B 0.9900 . ?
C42 C43 1.619(15) . ?
C42 C43 1.619(15) 8_565 ?
C42 H42A 0.9600 . ?
C42 H42B 0.9600 . ?
C43 C43 1.45(3) 8_565 ?
C43 H43A 0.9600 . ?
C43 H43B 0.9601 . ?
C44 C45 1.367(9) 8_565 ?
C44 C45 1.367(9) . ?
C45 C46 1.385(9) . ?
C45 H45 0.9500 . ?
C46 C47 1.382(8) . ?
C46 H46 0.9500 . ?
C47 C46 1.382(8) 8_565 ?
O1A C2A 1.497(11) . ?
C2A O1A 1.497(11) 8_565 ?
 
loop_
 _geom_angle_atom_site_label_1
 _geom_angle_atom_site_label_2
 _geom_angle_atom_site_label_3
 _geom_angle
 _geom_angle_site_symmetry_1
 _geom_angle_site_symmetry_3
 _geom_angle_publ_flag
O3 K1 O3 125.5(2) 8_565 . ?
O3 K1 O5 117.23(10) 8_565 . ?
O3 K1 O5 117.23(10) . . ?
O3 K1 O4 171.61(16) 8_565 . ?
O3 K1 O4 58.00(14) . . ?
O5 K1 O4 59.57(11) . . ?
O3 K1 O4 58.00(14) 8_565 8_565 ?
O3 K1 O4 171.61(16) . 8_565 ?
O5 K1 O4 59.57(11) . 8_565 ?
O4 K1 O4 117.4(2) . 8_565 ?
O3 K1 C36 93.29(18) 8_565 . ?
O3 K1 C36 93.29(18) . . ?
O5 K1 C36 85.0(3) . . ?
O4 K1 C36 94.1(2) . . ?
O4 K1 C36 94.1(2) 8_565 . ?
O3 K1 C25 90.24(13) 8_565 . ?
O3 K1 C25 90.24(13) . . ?
O5 K1 C25 87.3(2) . . ?
O4 K1 C25 81.97(14) . . ?
O4 K1 C25 81.97(14) 8_565 . ?
C36 K1 C25 172.3(4) . . ?
O3 K1 C35 68.1(3) 8_565 8_565 ?
O3 K1 C35 107.0(3) . 8_565 ?
O5 K1 C35 97.1(2) . 8_565 ?
O4 K1 C35 119.3(3) . 8_565 ?
O4 K1 C35 81.4(2) 8_565 8_565 ?
C36 K1 C35 25.2(2) . 8_565 ?
C25 K1 C35 157.5(2) . 8_565 ?
O3 K1 C35 107.0(3) 8_565 . ?
O3 K1 C35 68.1(3) . . ?
O5 K1 C35 97.1(2) . . ?
O4 K1 C35 81.4(2) . . ?
O4 K1 C35 119.3(3) 8_565 . ?
C36 K1 C35 25.2(2) . . ?
C25 K1 C35 157.5(2) . . ?
C35 K1 C35 43.9(5) 8_565 . ?
O3 K1 C24 103.62(18) 8_565 . ?
O3 K1 C24 65.16(17) . . ?
O5 K1 C24 99.58(17) . . ?
O4 K1 C24 70.33(17) . . ?
O4 K1 C24 107.06(17) 8_565 . ?
C36 K1 C24 157.75(15) . . ?
C25 K1 C24 25.10(13) . . ?
C35 K1 C24 163.3(2) 8_565 . ?
C35 K1 C24 133.0(3) . . ?
O3 K1 C24 65.16(17) 8_565 8_565 ?
O3 K1 C24 103.62(18) . 8_565 ?
O5 K1 C24 99.58(17) . 8_565 ?
O4 K1 C24 107.06(17) . 8_565 ?
O4 K1 C24 70.33(17) 8_565 8_565 ?
C36 K1 C24 157.75(15) . 8_565 ?
C25 K1 C24 25.10(13) . 8_565 ?
C35 K1 C24 133.0(3) 8_565 8_565 ?
C35 K1 C24 163.3(2) . 8_565 ?
C24 K1 C24 43.3(3) . 8_565 ?
O3 K1 C34 57.7(2) 8_565 8_565 ?
O3 K1 C34 95.1(2) . 8_565 ?
O5 K1 C34 121.11(19) . 8_565 ?
O4 K1 C34 130.7(2) . 8_565 ?
O4 K1 C34 93.0(2) 8_565 8_565 ?
C36 K1 C34 42.8(3) . 8_565 ?
C25 K1 C34 143.6(2) . 8_565 ?
C35 K1 C34 24.1(2) 8_565 8_565 ?
C35 K1 C34 49.4(3) . 8_565 ?
C24 K1 C34 139.26(19) . 8_565 ?
C24 K1 C34 119.9(2) 8_565 8_565 ?
C20 O1 C20 99(2) . 8_565 ?
C20 O1 C19 129.3(12) . . ?
C20 O1 C19 129.3(12) 8_565 . ?
C22 O2 C21 109.9(9) . . ?
C28 O3 C38 115.3(6) . . ?
C28 O3 K1 122.2(4) . . ?
C38 O3 K1 121.1(4) . . ?
C39 O4 C40 110.4(6) . . ?
C39 O4 K1 114.6(4) . . ?
C40 O4 K1 114.6(5) . . ?
C41 O5 C41 108.8(8) . 8_565 ?
C41 O5 K1 116.3(4) . . ?
C41 O5 K1 116.3(4) 8_565 . ?
C37 O6 C42 110.0(8) . . ?
C43 O7 C43 79.4(15) 8_565 . ?
C43 O7 C44 132.2(9) 8_565 . ?
C43 O7 C44 132.2(9) . . ?
C1 N1 C4 110.9(5) . . ?
C1 N1 H1 124.6 . . ?
C4 N1 H1 124.6 . . ?
C6 N2 C9 109.6(5) . . ?
C6 N2 H2 125.2 . . ?
C9 N2 H2 125.2 . . ?
C2 C1 N1 106.2(6) . . ?
C2 C1 C11 132.0(6) . . ?
N1 C1 C11 121.3(6) . . ?
C1 C2 C3 108.3(6) . . ?
C1 C2 H2A 125.9 . . ?
C3 C2 H2A 125.9 . . ?
C4 C3 C2 108.0(6) . . ?
C4 C3 H3 126.0 . . ?
C2 C3 H3 126.0 . . ?
C3 C4 N1 106.5(6) . . ?
C3 C4 C5 132.0(7) . . ?
N1 C4 C5 121.4(6) . . ?
C4 C5 C6 111.4(6) . . ?
C4 C5 C14 109.4(6) . . ?
C6 C5 C14 109.8(6) . . ?
C4 C5 C13 107.9(6) . . ?
C6 C5 C13 108.6(6) . . ?
C14 C5 C13 109.7(7) . . ?
C7 C6 N2 108.0(6) . . ?
C7 C6 C5 131.3(6) . . ?
N2 C6 C5 120.6(6) . . ?
C6 C7 C8 107.4(6) . . ?
C6 C7 H7 126.3 . . ?
C8 C7 H7 126.3 . . ?
C9 C8 C7 108.0(6) . . ?
C9 C8 H8 126.0 . . ?
C7 C8 H8 126.0 . . ?
C8 C9 N2 106.9(5) . . ?
C8 C9 C10 131.8(6) . . ?
N2 C9 C10 121.2(5) . . ?
C9 C10 C9 111.0(7) . 8_565 ?
C9 C10 C16 111.7(4) . . ?
C9 C10 C16 111.7(4) 8_565 . ?
C9 C10 C15 107.2(5) . . ?
C9 C10 C15 107.2(5) 8_565 . ?
C16 C10 C15 107.9(7) . . ?
C1 C11 C1 112.7(7) 8_565 . ?
C1 C11 C47 110.2(5) 8_565 . ?
C1 C11 C47 110.2(5) . . ?
C1 C11 C12 107.7(5) 8_565 . ?
C1 C11 C12 107.7(5) . . ?
C47 C11 C12 108.3(7) . . ?
C11 C12 H12A 109.5 . . ?
C11 C12 H12B 109.5 . . ?
H12A C12 H12B 109.5 . . ?
C5 C13 H13A 109.5 . . ?
C5 C13 H13B 109.5 . . ?
H13A C13 H13B 109.5 . . ?
C5 C13 H13C 109.5 . . ?
H13A C13 H13C 109.5 . . ?
H13B C13 H13C 109.5 . . ?
C5 C14 H14A 109.5 . . ?
C5 C14 H14B 109.5 . . ?
H14A C14 H14B 109.5 . . ?
C5 C14 H14C 109.5 . . ?
H14A C14 H14C 109.5 . . ?
H14B C14 H14C 109.5 . . ?
C10 C15 H15A 109.6 . . ?
C10 C15 H15B 109.4 . . ?
H15A C15 H15B 109.5 . . ?
C17 C16 C17 116.5(8) . 8_565 ?
C17 C16 C10 121.7(4) . . ?
C17 C16 C10 121.7(4) 8_565 . ?
C18 C17 C16 122.2(7) . . ?
C18 C17 H17 118.9 . . ?
C16 C17 H17 118.9 . . ?
C19 C18 C17 120.1(7) . . ?
C19 C18 H18 120.0 . . ?
C17 C18 H18 120.0 . . ?
C18 C19 C18 118.8(9) . 8_565 ?
C18 C19 O1 120.6(5) . . ?
C18 C19 O1 120.6(5) 8_565 . ?
O1 C20 C21 98.9(16) . . ?
O1 C20 C20 40.7(12) . 8_565 ?
C21 C20 C20 58.6(8) . 8_565 ?
O1 C20 H20A 114.7 . . ?
C21 C20 H20A 114.1 . . ?
C20 C20 H20A 133.5 8_565 . ?
O1 C20 H20B 110.2 . . ?
C21 C20 H20B 108.6 . . ?
C20 C20 H20B 116.0 8_565 . ?
H20A C20 H20B 109.7 . . ?
O2 C21 C20 110.7(13) . 8_565 ?
O2 C21 C20 110.7(13) . . ?
C20 C21 C20 62.8(16) 8_565 . ?
O2 C21 H21A 109.4 . . ?
C20 C21 H21A 139.7 8_565 . ?
C20 C21 H21A 106.2 . . ?
O2 C21 H21B 112.1 . . ?
C20 C21 H21B 49.8 8_565 . ?
C20 C21 H21B 108.6 . . ?
H21A C21 H21B 109.6 . . ?
O2 C22 C23 119.0(4) . 8_565 ?
O2 C22 C23 119.0(4) . . ?
C23 C22 C23 121.9(9) 8_565 . ?
C24 C23 C22 117.6(7) . . ?
C24 C23 C26 121.4(7) . . ?
C22 C23 C26 121.0(6) . . ?
C25 C24 C23 121.3(7) . . ?
C25 C24 K1 70.8(4) . . ?
C23 C24 K1 94.8(4) . . ?
C25 C24 H24A 119.3 . . ?
C23 C24 H24A 119.3 . . ?
K1 C24 H24A 104.5 . . ?
C24 C25 C24 119.7(9) 8_565 . ?
C24 C25 K1 84.1(4) 8_565 . ?
C24 C25 K1 84.1(4) . . ?
C24 C25 H25A 120.2 8_565 . ?
C24 C25 H25A 120.2 . . ?
K1 C25 H25A 101.7 . . ?
C23 C26 C27 115.4(6) . . ?
C23 C26 H26A 108.4 . . ?
C27 C26 H26A 108.4 . . ?
C23 C26 H26B 108.4 . . ?
C27 C26 H26B 108.4 . . ?
H26A C26 H26B 107.5 . . ?
C32 C27 C28 117.4(8) . . ?
C32 C27 C26 121.0(9) . . ?
C28 C27 C26 121.5(7) . . ?
C29 C28 C27 122.7(8) . . ?
C29 C28 O3 116.2(8) . . ?
C27 C28 O3 121.0(8) . . ?
C30 C29 C28 118.0(10) . . ?
C30 C29 C33 120.2(10) . . ?
C28 C29 C33 121.8(8) . . ?
C29 C30 C31 121.6(10) . . ?
C29 C30 H30 119.2 . . ?
C31 C30 H30 119.2 . . ?
C30 C31 C32 118.5(9) . . ?
C30 C31 H31 120.7 . . ?
C32 C31 H31 120.7 . . ?
C27 C32 C31 121.7(10) . . ?
C27 C32 H32 119.2 . . ?
C31 C32 H32 119.2 . . ?
C29 C33 C34 115.5(7) . . ?
C29 C33 H33A 108.4 . . ?
C34 C33 H33A 108.4 . . ?
C29 C33 H33B 108.4 . . ?
C34 C33 H33B 108.4 . . ?
H33A C33 H33B 107.5 . . ?
C37 C34 C35 118.3(11) . . ?
C37 C34 C33 120.9(8) . . ?
C35 C34 C33 120.8(10) . . ?
C37 C34 K1 86.6(6) . . ?
C35 C34 K1 67.4(4) . . ?
C33 C34 K1 115.8(6) . . ?
C36 C35 C34 120.3(14) . . ?
C36 C35 K1 72.8(8) . . ?
C34 C35 K1 88.6(5) . . ?
C36 C35 H35A 119.8 . . ?
C34 C35 H35A 119.8 . . ?
K1 C35 H35A 108.8 . . ?
C35 C36 C35 120.8(17) 8_565 . ?
C35 C36 K1 82.0(8) 8_565 . ?
C35 C36 K1 82.0(8) . . ?
C35 C36 H36A 119.6 8_565 . ?
C35 C36 H36A 119.6 . . ?
K1 C36 H36A 106.4 . . ?
O6 C37 C34 119.4(6) . . ?
O6 C37 C34 119.4(6) . 8_565 ?
C34 C37 C34 121.2(12) . 8_565 ?
O3 C38 C39 109.0(7) . . ?
O3 C38 H38A 109.9 . . ?
C39 C38 H38A 109.9 . . ?
O3 C38 H38B 109.9 . . ?
C39 C38 H38B 109.9 . . ?
H38A C38 H38B 108.3 . . ?
O4 C39 C38 108.4(7) . . ?
O4 C39 H39A 110.0 . . ?
C38 C39 H39A 110.0 . . ?
O4 C39 H39B 110.0 . . ?
C38 C39 H39B 110.0 . . ?
H39A C39 H39B 108.4 . . ?
O4 C40 C41 108.1(6) . . ?
O4 C40 H40A 110.1 . . ?
C41 C40 H40A 110.1 . . ?
O4 C40 H40B 110.1 . . ?
C41 C40 H40B 110.1 . . ?
H40A C40 H40B 108.4 . . ?
O5 C41 C40 108.7(6) . . ?
O5 C41 H41A 109.9 . . ?
C40 C41 H41A 109.9 . . ?
O5 C41 H41B 109.9 . . ?
C40 C41 H41B 109.9 . . ?
H41A C41 H41B 108.3 . . ?
O6 C42 C43 105.6(9) . . ?
O6 C42 C43 105.6(9) . 8_565 ?
C43 C42 C43 53.3(12) . 8_565 ?
O6 C42 H42A 110.5 . . ?
C43 C42 H42A 113.3 . . ?
C43 C42 H42A 143.8 8_565 . ?
O6 C42 H42B 111.1 . . ?
C43 C42 H42B 107.3 . . ?
C43 C42 H42B 57.3 8_565 . ?
H42A C42 H42B 109.0 . . ?
O7 C43 C43 50.3(8) . 8_565 ?
O7 C43 C42 107.8(12) . . ?
C43 C43 C42 63.4(6) 8_565 . ?
O7 C43 H43A 109.2 . . ?
C43 C43 H43A 105.6 8_565 . ?
C42 C43 H43A 113.1 . . ?
O7 C43 H43B 107.9 . . ?
C43 C43 H43B 143.4 8_565 . ?
C42 C43 H43B 108.8 . . ?
H43A C43 H43B 109.9 . . ?
O7 C44 C45 120.4(5) . 8_565 ?
O7 C44 C45 120.4(5) . . ?
C45 C44 C45 119.3(10) 8_565 . ?
C44 C45 C46 119.8(8) . . ?
C44 C45 H45 120.1 . . ?
C46 C45 H45 120.1 . . ?
C47 C46 C45 123.0(8) . . ?
C47 C46 H46 118.5 . . ?
C45 C46 H46 118.5 . . ?
C46 C47 C46 115.1(9) . 8_565 ?
C46 C47 C11 122.4(5) . . ?
C46 C47 C11 122.4(5) 8_565 . ?
O1A C2A O1A 104.6(10) . 8_565 ?
 
loop_
 _geom_torsion_atom_site_label_1
 _geom_torsion_atom_site_label_2
 _geom_torsion_atom_site_label_3
 _geom_torsion_atom_site_label_4
 _geom_torsion
 _geom_torsion_site_symmetry_1
 _geom_torsion_site_symmetry_2
 _geom_torsion_site_symmetry_3
 _geom_torsion_site_symmetry_4
 _geom_torsion_publ_flag
O3 K1 O3 C28 -1.7(7) 8_565 . . . ?
O5 K1 O3 C28 -179.3(6) . . . . ?
O4 K1 O3 C28 -172.6(6) . . . . ?
O4 K1 O3 C28 -113.8(12) 8_565 . . . ?
C36 K1 O3 C28 94.7(6) . . . . ?
C25 K1 O3 C28 -92.2(6) . . . . ?
C35 K1 O3 C28 73.1(6) 8_565 . . . ?
C35 K1 O3 C28 94.0(6) . . . . ?
C24 K1 O3 C28 -91.1(6) . . . . ?
C24 K1 O3 C28 -70.8(6) 8_565 . . . ?
C34 K1 O3 C28 51.7(6) 8_565 . . . ?
O3 K1 O3 C38 163.7(5) 8_565 . . . ?
O5 K1 O3 C38 -13.8(6) . . . . ?
O4 K1 O3 C38 -7.1(5) . . . . ?
O4 K1 O3 C38 51.7(14) 8_565 . . . ?
C36 K1 O3 C38 -99.9(6) . . . . ?
C25 K1 O3 C38 73.3(6) . . . . ?
C35 K1 O3 C38 -121.4(6) 8_565 . . . ?
C35 K1 O3 C38 -100.5(6) . . . . ?
C24 K1 O3 C38 74.4(6) . . . . ?
C24 K1 O3 C38 94.7(6) 8_565 . . . ?
C34 K1 O3 C38 -142.8(6) 8_565 . . . ?
O3 K1 O4 C39 -142.7(11) 8_565 . . . ?
O3 K1 O4 C39 -25.6(6) . . . . ?
O5 K1 O4 C39 147.5(6) . . . . ?
O4 K1 O4 C39 162.5(5) 8_565 . . . ?
C36 K1 O4 C39 65.8(6) . . . . ?
C25 K1 O4 C39 -120.9(6) . . . . ?
C35 K1 O4 C39 67.0(6) 8_565 . . . ?
C35 K1 O4 C39 44.0(6) . . . . ?
C24 K1 O4 C39 -97.9(6) . . . . ?
C24 K1 O4 C39 -121.2(6) 8_565 . . . ?
C34 K1 O4 C39 41.0(7) 8_565 . . . ?
O3 K1 O4 C40 88.2(12) 8_565 . . . ?
O3 K1 O4 C40 -154.6(5) . . . . ?
O5 K1 O4 C40 18.5(5) . . . . ?
O4 K1 O4 C40 33.4(6) 8_565 . . . ?
C36 K1 O4 C40 -63.3(6) . . . . ?
C25 K1 O4 C40 110.0(5) . . . . ?
C35 K1 O4 C40 -62.1(5) 8_565 . . . ?
C35 K1 O4 C40 -85.1(5) . . . . ?
C24 K1 O4 C40 133.0(5) . . . . ?
C24 K1 O4 C40 109.7(5) 8_565 . . . ?
C34 K1 O4 C40 -88.1(5) 8_565 . . . ?
O3 K1 O5 C41 -154.0(5) 8_565 . . . ?
O3 K1 O5 C41 23.7(5) . . . . ?
O4 K1 O5 C41 17.1(5) . . . . ?
O4 K1 O5 C41 -147.4(6) 8_565 . . . ?
C36 K1 O5 C41 114.9(5) . . . . ?
C25 K1 O5 C41 -65.1(5) . . . . ?
C35 K1 O5 C41 137.0(5) 8_565 . . . ?
C35 K1 O5 C41 92.7(5) . . . . ?
C24 K1 O5 C41 -43.2(5) . . . . ?
C24 K1 O5 C41 -87.1(5) 8_565 . . . ?
C34 K1 O5 C41 139.0(5) 8_565 . . . ?
O3 K1 O5 C41 -23.7(5) 8_565 . . 8_565 ?
O3 K1 O5 C41 154.0(5) . . . 8_565 ?
O4 K1 O5 C41 147.4(6) . . . 8_565 ?
O4 K1 O5 C41 -17.1(5) 8_565 . . 8_565 ?
C36 K1 O5 C41 -114.9(5) . . . 8_565 ?
C25 K1 O5 C41 65.1(5) . . . 8_565 ?
C35 K1 O5 C41 -92.7(5) 8_565 . . 8_565 ?
C35 K1 O5 C41 -137.0(5) . . . 8_565 ?
C24 K1 O5 C41 87.1(5) . . . 8_565 ?
C24 K1 O5 C41 43.2(5) 8_565 . . 8_565 ?
C34 K1 O5 C41 -90.7(6) 8_565 . . 8_565 ?
C4 N1 C1 C2 0.3(7) . . . . ?
C4 N1 C1 C11 -172.9(6) . . . . ?
N1 C1 C2 C3 0.5(7) . . . . ?
C11 C1 C2 C3 172.6(7) . . . . ?
C1 C2 C3 C4 -1.1(8) . . . . ?
C2 C3 C4 N1 1.3(8) . . . . ?
C2 C3 C4 C5 -175.8(7) . . . . ?
C1 N1 C4 C3 -1.0(7) . . . . ?
C1 N1 C4 C5 176.5(6) . . . . ?
C3 C4 C5 C6 -116.1(9) . . . . ?
N1 C4 C5 C6 67.2(9) . . . . ?
C3 C4 C5 C14 122.3(9) . . . . ?
N1 C4 C5 C14 -54.4(8) . . . . ?
C3 C4 C5 C13 3.1(12) . . . . ?
N1 C4 C5 C13 -173.6(7) . . . . ?
C9 N2 C6 C7 0.8(7) . . . . ?
C9 N2 C6 C5 -177.0(5) . . . . ?
C4 C5 C6 C7 110.2(8) . . . . ?
C14 C5 C6 C7 -128.5(8) . . . . ?
C13 C5 C6 C7 -8.5(10) . . . . ?
C4 C5 C6 N2 -72.6(8) . . . . ?
C14 C5 C6 N2 48.7(8) . . . . ?
C13 C5 C6 N2 168.7(6) . . . . ?
N2 C6 C7 C8 0.1(7) . . . . ?
C5 C6 C7 C8 177.6(6) . . . . ?
C6 C7 C8 C9 -1.1(7) . . . . ?
C7 C8 C9 N2 1.6(7) . . . . ?
C7 C8 C9 C10 -175.3(6) . . . . ?
C6 N2 C9 C8 -1.5(6) . . . . ?
C6 N2 C9 C10 175.7(5) . . . . ?
C8 C9 C10 C9 -108.1(7) . . . 8_565 ?
N2 C9 C10 C9 75.4(8) . . . 8_565 ?
C8 C9 C10 C16 126.5(7) . . . . ?
N2 C9 C10 C16 -50.0(8) . . . . ?
C8 C9 C10 C15 8.6(9) . . . . ?
N2 C9 C10 C15 -167.9(6) . . . . ?
C2 C1 C11 C1 116.5(7) . . . 8_565 ?
N1 C1 C11 C1 -72.3(9) . . . 8_565 ?
C2 C1 C11 C47 -120.0(8) . . . . ?
N1 C1 C11 C47 51.1(8) . . . . ?
C2 C1 C11 C12 -2.1(10) . . . . ?
N1 C1 C11 C12 169.0(6) . . . . ?
C9 C10 C16 C17 152.6(7) . . . . ?
C9 C10 C16 C17 27.6(10) 8_565 . . . ?
C15 C10 C16 C17 -89.9(7) . . . . ?
C9 C10 C16 C17 -27.6(10) . . . 8_565 ?
C9 C10 C16 C17 -152.6(7) 8_565 . . 8_565 ?
C15 C10 C16 C17 89.9(7) . . . 8_565 ?
C17 C16 C17 C18 1.8(13) 8_565 . . . ?
C10 C16 C17 C18 -178.3(7) . . . . ?
C16 C17 C18 C19 0.2(12) . . . . ?
C17 C18 C19 C18 -2.4(15) . . . 8_565 ?
C17 C18 C19 O1 174.6(8) . . . . ?
C20 O1 C19 C18 -10(2) . . . . ?
C20 O1 C19 C18 -167.0(19) 8_565 . . . ?
C20 O1 C19 C18 167.0(19) . . . 8_565 ?
C20 O1 C19 C18 10(2) 8_565 . . 8_565 ?
C20 O1 C20 C21 -7(3) 8_565 . . . ?
C19 O1 C20 C21 -169.3(12) . . . . ?
C19 O1 C20 C20 -162(3) . . . 8_565 ?
C22 O2 C21 C20 -146.1(9) . . . 8_565 ?
C22 O2 C21 C20 146.1(9) . . . . ?
O1 C20 C21 O2 108.7(15) . . . . ?
C20 C20 C21 O2 103.3(10) 8_565 . . . ?
O1 C20 C21 C20 5(2) . . . 8_565 ?
C21 O2 C22 C23 90.1(7) . . . 8_565 ?
C21 O2 C22 C23 -90.1(7) . . . . ?
O2 C22 C23 C24 172.9(7) . . . . ?
C23 C22 C23 C24 -7.3(13) 8_565 . . . ?
O2 C22 C23 C26 -9.9(12) . . . . ?
C23 C22 C23 C26 169.9(6) 8_565 . . . ?
C22 C23 C24 C25 1.6(11) . . . . ?
C26 C23 C24 C25 -175.6(7) . . . . ?
C22 C23 C24 K1 71.9(7) . . . . ?
C26 C23 C24 K1 -105.3(6) . . . . ?
O3 K1 C24 C25 59.5(5) 8_565 . . . ?
O3 K1 C24 C25 -177.4(5) . . . . ?
O5 K1 C24 C25 -61.7(5) . . . . ?
O4 K1 C24 C25 -114.4(5) . . . . ?
O4 K1 C24 C25 -0.8(5) 8_565 . . . ?
C36 K1 C24 C25 -162.1(9) . . . . ?
C35 K1 C24 C25 117.7(9) 8_565 . . . ?
C35 K1 C24 C25 -171.0(5) . . . . ?
C24 K1 C24 C25 32.1(5) 8_565 . . . ?
C34 K1 C24 C25 115.4(5) 8_565 . . . ?
O3 K1 C24 C23 -62.1(5) 8_565 . . . ?
O3 K1 C24 C23 61.0(4) . . . . ?
O5 K1 C24 C23 176.7(4) . . . . ?
O4 K1 C24 C23 124.0(5) . . . . ?
O4 K1 C24 C23 -122.3(4) 8_565 . . . ?
C36 K1 C24 C23 76.4(10) . . . . ?
C25 K1 C24 C23 -121.6(7) . . . . ?
C35 K1 C24 C23 -3.9(12) 8_565 . . . ?
C35 K1 C24 C23 67.5(6) . . . . ?
C24 K1 C24 C23 -89.4(4) 8_565 . . . ?
C34 K1 C24 C23 -6.2(6) 8_565 . . . ?
C23 C24 C25 C24 3.9(13) . . . 8_565 ?
K1 C24 C25 C24 -79.8(8) . . . 8_565 ?
C23 C24 C25 K1 83.7(6) . . . . ?
O3 K1 C25 C24 -2.4(4) 8_565 . . 8_565 ?
O3 K1 C25 C24 123.1(4) . . . 8_565 ?
O5 K1 C25 C24 -119.6(4) . . . 8_565 ?
O4 K1 C25 C24 -179.3(5) . . . 8_565 ?
O4 K1 C25 C24 -60.0(4) 8_565 . . 8_565 ?
C36 K1 C25 C24 -119.6(4) . . . 8_565 ?
C35 K1 C25 C24 -17.5(9) 8_565 . . 8_565 ?
C35 K1 C25 C24 138.2(6) . . . 8_565 ?
C24 K1 C25 C24 120.7(9) . . . 8_565 ?
C34 K1 C25 C24 24.2(6) 8_565 . . 8_565 ?
O3 K1 C25 C24 -123.1(4) 8_565 . . . ?
O3 K1 C25 C24 2.4(4) . . . . ?
O5 K1 C25 C24 119.6(4) . . . . ?
O4 K1 C25 C24 60.0(4) . . . . ?
O4 K1 C25 C24 179.3(5) 8_565 . . . ?
C36 K1 C25 C24 119.6(4) . . . . ?
C35 K1 C25 C24 -138.2(6) 8_565 . . . ?
C35 K1 C25 C24 17.5(9) . . . . ?
C24 K1 C25 C24 -120.7(9) 8_565 . . . ?
C34 K1 C25 C24 -96.6(4) 8_565 . . . ?
C24 C23 C26 C27 115.2(8) . . . . ?
C22 C23 C26 C27 -61.9(10) . . . . ?
C23 C26 C27 C32 116.0(8) . . . . ?
C23 C26 C27 C28 -60.0(10) . . . . ?
C32 C27 C28 C29 -0.7(12) . . . . ?
C26 C27 C28 C29 175.4(7) . . . . ?
C32 C27 C28 O3 -179.3(6) . . . . ?
C26 C27 C28 O3 -3.2(11) . . . . ?
C38 O3 C28 C29 105.9(8) . . . . ?
K1 O3 C28 C29 -87.8(7) . . . . ?
C38 O3 C28 C27 -75.5(9) . . . . ?
K1 O3 C28 C27 90.8(8) . . . . ?
C27 C28 C29 C30 0.5(13) . . . . ?
O3 C28 C29 C30 179.1(8) . . . . ?
C27 C28 C29 C33 -178.9(8) . . . . ?
O3 C28 C29 C33 -0.3(12) . . . . ?
C28 C29 C30 C31 0.8(16) . . . . ?
C33 C29 C30 C31 -179.8(11) . . . . ?
C29 C30 C31 C32 -1.9(18) . . . . ?
C28 C27 C32 C31 -0.4(13) . . . . ?
C26 C27 C32 C31 -176.5(8) . . . . ?
C30 C31 C32 C27 1.6(16) . . . . ?
C30 C29 C33 C34 -114.5(10) . . . . ?
C28 C29 C33 C34 64.9(12) . . . . ?
C29 C33 C34 C37 56.4(12) . . . . ?
C29 C33 C34 C35 -123.7(9) . . . . ?
C29 C33 C34 K1 -45.8(10) . . . . ?
O3 K1 C34 C37 1.4(6) 8_565 . . . ?
O3 K1 C34 C37 -127.8(6) . . . . ?
O5 K1 C34 C37 127.6(5) . . . . ?
O4 K1 C34 C37 -176.5(6) . . . . ?
O4 K1 C34 C37 52.8(6) 8_565 . . . ?
C36 K1 C34 C37 90.8(7) . . . . ?
C25 K1 C34 C37 -95.9(7) . . . . ?
C35 K1 C34 C37 56.7(6) 8_565 . . . ?
C35 K1 C34 C37 122.7(11) . . . . ?
C24 K1 C34 C37 -107.5(6) . . . . ?
C24 K1 C34 C37 -55.7(8) 8_565 . . . ?
C34 K1 C34 C37 24.6(6) 8_565 . . . ?
O3 K1 C34 C35 -121.2(7) 8_565 . . . ?
O3 K1 C34 C35 109.5(8) . . . . ?
O5 K1 C34 C35 5.0(8) . . . . ?
O4 K1 C34 C35 60.9(7) . . . . ?
O4 K1 C34 C35 -69.9(8) 8_565 . . . ?
C36 K1 C34 C35 -31.9(8) . . . . ?
C25 K1 C34 C35 141.4(7) . . . . ?
C35 K1 C34 C35 -66.0(9) 8_565 . . . ?
C24 K1 C34 C35 129.8(7) . . . . ?
C24 K1 C34 C35 -178.4(7) 8_565 . . . ?
C34 K1 C34 C35 -98.1(7) 8_565 . . . ?
O3 K1 C34 C33 124.3(6) 8_565 . . . ?
O3 K1 C34 C33 -5.0(6) . . . . ?
O5 K1 C34 C33 -109.5(6) . . . . ?
O4 K1 C34 C33 -53.6(6) . . . . ?
O4 K1 C34 C33 175.6(5) 8_565 . . . ?
C36 K1 C34 C33 -146.4(8) . . . . ?
C25 K1 C34 C33 26.9(8) . . . . ?
C35 K1 C34 C33 179.5(7) 8_565 . . . ?
C35 K1 C34 C33 -114.5(11) . . . . ?
C24 K1 C34 C33 15.4(7) . . . . ?
C24 K1 C34 C33 67.1(8) 8_565 . . . ?
C34 K1 C34 C33 147.4(6) 8_565 . . . ?
C37 C34 C35 C36 -3.5(15) . . . . ?
C33 C34 C35 C36 176.5(11) . . . . ?
K1 C34 C35 C36 69.1(10) . . . . ?
C37 C34 C35 K1 -72.6(8) . . . . ?
C33 C34 C35 K1 107.4(7) . . . . ?
O3 K1 C35 C36 -59.5(9) 8_565 . . . ?
O3 K1 C35 C36 178.4(9) . . . . ?
O5 K1 C35 C36 61.9(9) . . . . ?
O4 K1 C35 C36 119.5(9) . . . . ?
O4 K1 C35 C36 2.9(10) 8_565 . . . ?
C25 K1 C35 C36 162.1(9) . . . . ?
C35 K1 C35 C36 -31.0(9) 8_565 . . . ?
C24 K1 C35 C36 172.1(8) . . . . ?
C24 K1 C35 C36 -118.8(8) 8_565 . . . ?
C34 K1 C35 C36 -63.5(9) 8_565 . . . ?
O3 K1 C35 C34 62.9(8) 8_565 . . . ?
O3 K1 C35 C34 -59.2(7) . . . . ?
O5 K1 C35 C34 -175.7(7) . . . . ?
O4 K1 C35 C34 -118.1(7) . . . . ?
O4 K1 C35 C34 125.3(7) 8_565 . . . ?
C36 K1 C35 C34 122.4(14) . . . . ?
C25 K1 C35 C34 -75.5(10) . . . . ?
C35 K1 C35 C34 91.4(7) 8_565 . . . ?
C24 K1 C35 C34 -65.5(8) . . . . ?
C24 K1 C35 C34 3.7(15) 8_565 . . . ?
C34 K1 C35 C34 58.9(7) 8_565 . . . ?
C34 C35 C36 C35 -2(2) . . . 8_565 ?
K1 C35 C36 C35 75.6(14) . . . 8_565 ?
C34 C35 C36 K1 -77.8(10) . . . . ?
O3 K1 C36 C35 1.5(9) 8_565 . . 8_565 ?
O3 K1 C36 C35 -124.4(8) . . . 8_565 ?
O5 K1 C36 C35 118.6(9) . . . 8_565 ?
O4 K1 C36 C35 177.5(8) . . . 8_565 ?
O4 K1 C36 C35 59.6(9) 8_565 . . 8_565 ?
C25 K1 C36 C35 118.6(9) . . . 8_565 ?
C35 K1 C36 C35 -122.9(17) . . . 8_565 ?
C24 K1 C36 C35 -138.3(5) . . . 8_565 ?
C24 K1 C36 C35 15.4(16) 8_565 . . 8_565 ?
C34 K1 C36 C35 -30.4(8) 8_565 . . 8_565 ?
O3 K1 C36 C35 124.4(8) 8_565 . . . ?
O3 K1 C36 C35 -1.5(9) . . . . ?
O5 K1 C36 C35 -118.6(9) . . . . ?
O4 K1 C36 C35 -59.6(9) . . . . ?
O4 K1 C36 C35 -177.5(8) 8_565 . . . ?
C25 K1 C36 C35 -118.6(9) . . . . ?
C35 K1 C36 C35 122.9(17) 8_565 . . . ?
C24 K1 C36 C35 -15.4(16) . . . . ?
C24 K1 C36 C35 138.3(5) 8_565 . . . ?
C34 K1 C36 C35 92.5(10) 8_565 . . . ?
C42 O6 C37 C34 90.3(8) . . . . ?
C42 O6 C37 C34 -90.3(8) . . . 8_565 ?
C35 C34 C37 O6 -171.2(7) . . . . ?
C33 C34 C37 O6 8.7(13) . . . . ?
K1 C34 C37 O6 126.8(8) . . . . ?
C35 C34 C37 C34 9.5(15) . . . 8_565 ?
C33 C34 C37 C34 -170.6(7) . . . 8_565 ?
K1 C34 C37 C34 -52.5(10) . . . 8_565 ?
C28 O3 C38 C39 -157.0(7) . . . . ?
K1 O3 C38 C39 36.6(9) . . . . ?
C40 O4 C39 C38 -174.2(7) . . . . ?
K1 O4 C39 C38 54.7(9) . . . . ?
O3 C38 C39 O4 -58.8(9) . . . . ?
C39 O4 C40 C41 179.6(7) . . . . ?
K1 O4 C40 C41 -49.3(8) . . . . ?
C41 O5 C41 C40 177.6(5) 8_565 . . . ?
K1 O5 C41 C40 -48.6(7) . . . . ?
O4 C40 C41 O5 65.0(9) . . . . ?
C37 O6 C42 C43 152.3(6) . . . . ?
C37 O6 C42 C43 -152.3(6) . . . 8_565 ?
C44 O7 C43 C43 138.7(19) . . . 8_565 ?
C43 O7 C43 C42 28.5(16) 8_565 . . . ?
C44 O7 C43 C42 167.2(9) . . . . ?
O6 C42 C43 O7 73.8(13) . . . . ?
C43 C42 C43 O7 -24.3(14) 8_565 . . . ?
O6 C42 C43 C43 98.1(5) . . . 8_565 ?
C43 O7 C44 C45 149.9(14) 8_565 . . 8_565 ?
C43 O7 C44 C45 31(2) . . . 8_565 ?
C43 O7 C44 C45 -31(2) 8_565 . . . ?
C43 O7 C44 C45 -149.9(14) . . . . ?
O7 C44 C45 C46 179.8(8) . . . . ?
C45 C44 C45 C46 -0.9(15) 8_565 . . . ?
C44 C45 C46 C47 -0.1(12) . . . . ?
C45 C46 C47 C46 1.0(13) . . . 8_565 ?
C45 C46 C47 C11 -175.4(7) . . . . ?
C1 C11 C47 C46 -29.5(11) 8_565 . . . ?
C1 C11 C47 C46 -154.4(7) . . . . ?
C12 C11 C47 C46 88.1(8) . . . . ?
C1 C11 C47 C46 154.4(7) 8_565 . . 8_565 ?
C1 C11 C47 C46 29.5(11) . . . 8_565 ?
C12 C11 C47 C46 -88.1(8) . . . 8_565 ?
 
_diffrn_measured_fraction_theta_max    0.995
_diffrn_reflns_theta_full              70.00
_diffrn_measured_fraction_theta_full   0.995
_refine_diff_density_max    0.637
_refine_diff_density_min   -0.416
_refine_diff_density_rms    0.058
